# Supplementary material for: A Hybrid Conv1D-LSTM Model with Temporal-Difference Reinforcement Learning for Error-Corrected Gas Forecasting in Critical Mining Environments
Source: Research Square preprint supplement (doi:10.21203/rs.3.rs-6967978/v1), 2025-06-25
Supplement: Supplementary file 1 [file e3e3e8d376021b8fc2fd09c4.pdf]

| Dataset  | Size  |
|----------|-------|
| Training | 6,551 |
| Testing  | 2,808 |
